# Supplementary material
Source: PubMed Central journal article supplement (PMC4333735)
Supplement: NIHMS654073-supplement-1.pdf [file NIHMS654073-supplement-1.pdf]

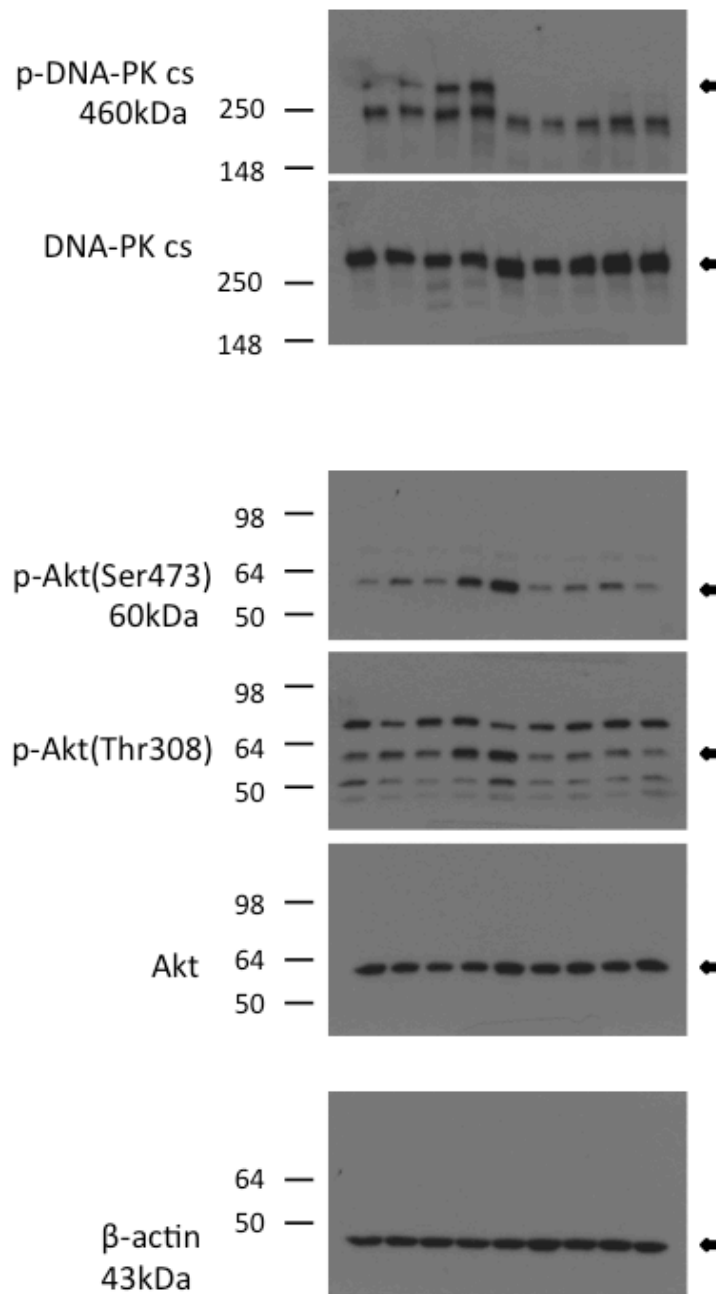

**Supplementary Figure 2. Full original blots of the data shown in Figure 1B.**

Arrows indicate bands shown in Figure 1B. The expected molecular weights of DNA-PKcs, Akt and  $\beta$ -actin are, respectively, approximately 460, 60 and 43 kDa.

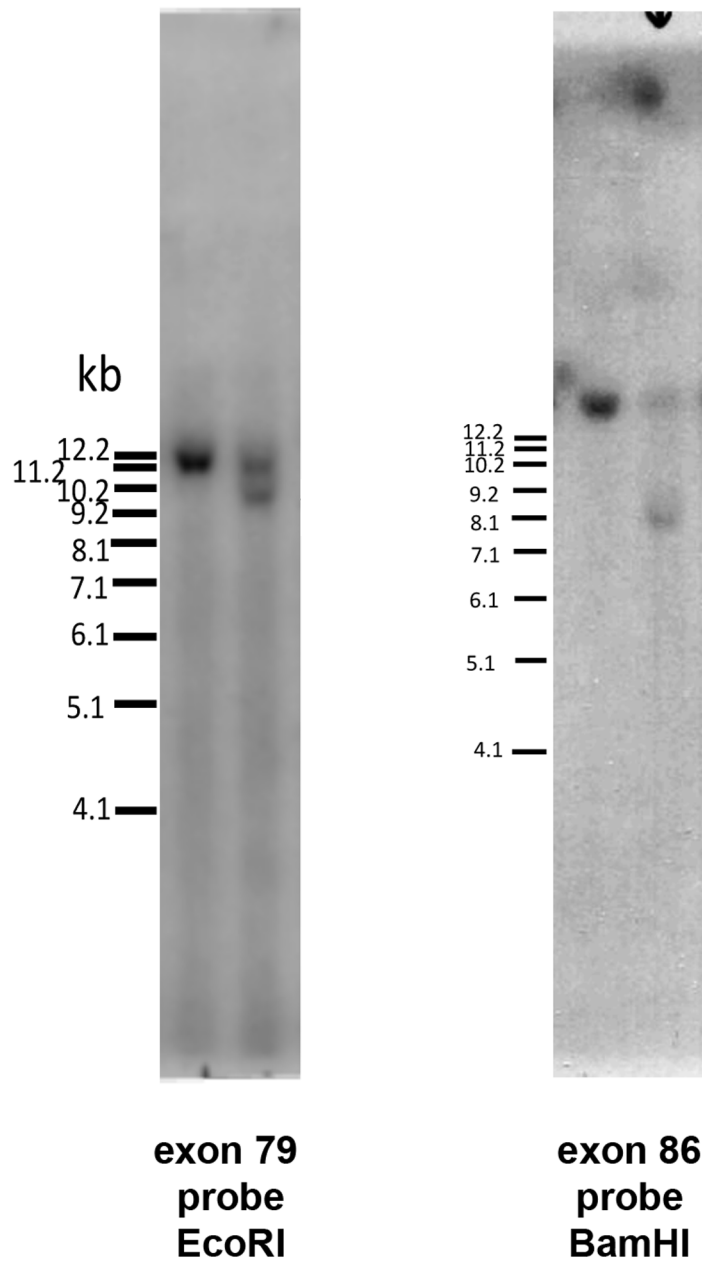

**Supplementary Figure 3. Full original blots of the data shown in Figure 4B.**

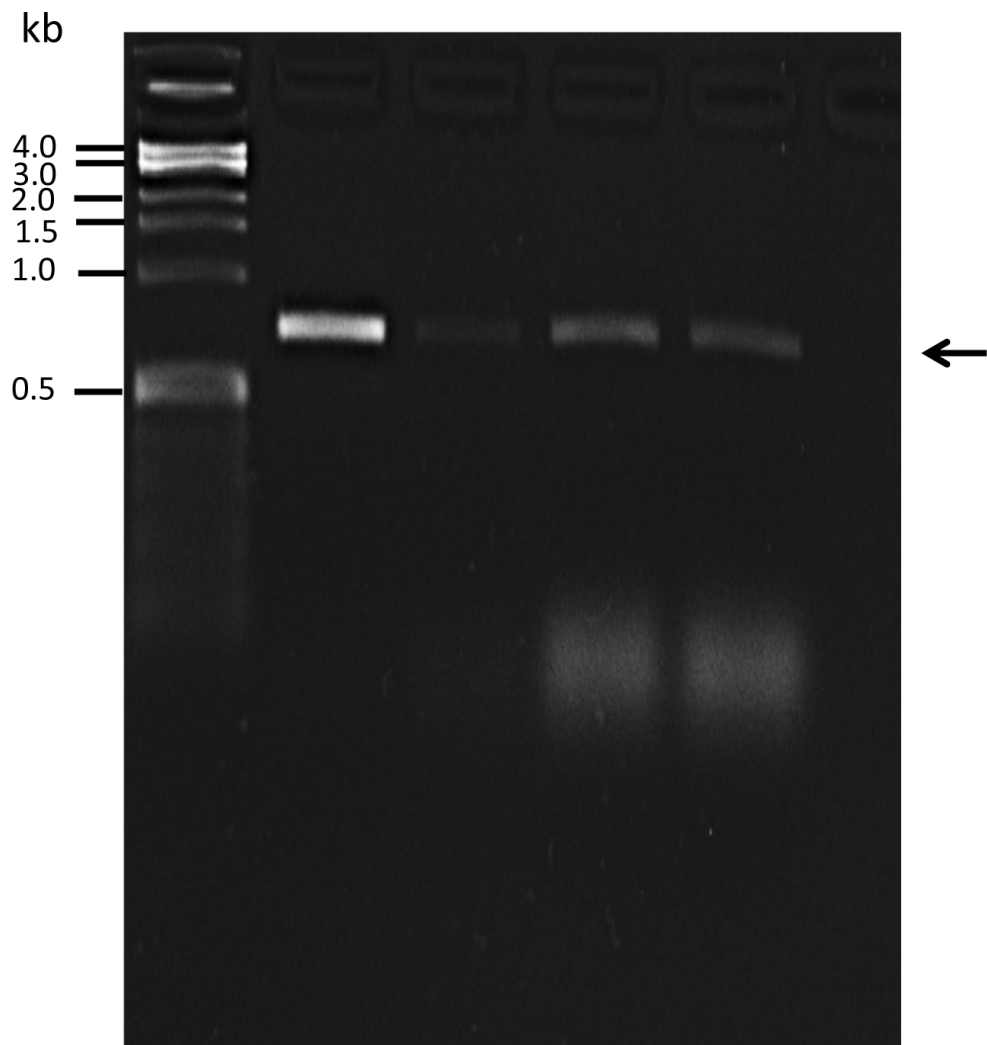

**Supplementary Figure 4. Full original blot of the data shown in Figure 4C.** The arrow indicates the bands shown in Figure 4C.
